# Supplementary material for: Synthesis of arylacetonitrile derivatives: Ni-catalyzed reaction of benzyl chlorides with trimethylsilyl cyanide under base-free conditions
Source: Royal Society of Chemistry journal article supplement (doi:10.1039/c4ra01153h), 2014-01-01

Electronic Supplementary Information

**Synthesis of Arylacetonitrile Derivatives; Ni-catalyzed Reaction of Benzyl Chlorides  
and Trimethylsilyl Cyanide under Base-free Conditions**

Yasushi Satoh, Yasushi Obora\*

*Department of Chemistry and Materials Engineering, Faculty of Chemistry, Materials and  
Bioengineering, Kansai University, Suita, Osaka 564-8680, Japan*

**Table of Contents**

S2: General and Experimental Section

S3-S4: Characterization

S4: Reference

S5-15: Copies of  $^1\text{H}$  NMR (400 MHz,  $\text{CDCl}_3$ ) and  $^{13}\text{C}$  NMR (100 MHz,  $\text{CDCl}_3$ ) spectra of **3a-3k**.

## General

GLC analysis was performed with a flame ionization detector using a  $0.22 \times 25$  m capillary column (BP-5).  $^1\text{H}$  and  $^{13}\text{C}$  NMR were measured at 400 and 100 MHz, respectively, in  $\text{CDCl}_3$  with  $\text{Me}_4\text{Si}$  as the internal standard. The products were characterized by  $^1\text{H}$  NMR,  $^{13}\text{C}$  NMR, HMQC, HMBC.

All reagents were commercially available and used without any purification.

## Experimental Section

### A typical reaction procedure for the preparation of **3a** (entry 13, Table 1):

A mixture of phenylacetonitrile (**1a**) (127 mg, 1 mmol), trimethylsilyl cyanide (**2**) (397 mg, 4 mmol),  $\text{Ni}(\text{cod})_2$  (28 mg, 0.2 mmol),  $\text{PPh}_3$  (52 mg, 0.2 mmol), and toluene (1 mL) was stirred for 16 h at 60 °C under Ar. The yields of the products were estimated from the peak areas based on the internal standard technique using GC and **3a** was obtained in 97% yield. The products (**3a**) was isolated by silica gel column chromatography (*n*-hexane:EtOAc=100:0 to 10:1 as eluent) in 83% yield (97 mg) as yellow liquid.

### A typical reaction procedure for the preparation of **3a** (Scheme 1):

A mixture of  $\text{Ni}(\eta^3\text{-CH}_2\text{Ph})(\text{PCy}_2\text{Ph})\text{Cl}$  (**6**) (182 mg, 0.4 mmol) with  $\text{TMSCN}$  (**2**) (159 mg, 1.6 mmol) and toluene (3 mL) was stirred for 40 h at 100 °C under Ar. The yields of the products were estimated from the peak areas based on the internal standard technique using GC and **3a** was obtained in 29% yield.

Compounds **3a-3d**<sup>1</sup>, **3e**<sup>2</sup>, **3g**<sup>1</sup>, **3h**<sup>1</sup>, **3i**<sup>3</sup>, **3j**<sup>3</sup>, and **3k**<sup>1</sup> are known compound and reported previously.

**3a**<sup>1</sup> : colorless liquid; <sup>1</sup>H-NMR (400 MHz, CDCl<sub>3</sub>) δ 3.71 (s, 2H), 7.32-7.36 (m, 5H); <sup>13</sup>C-NMR (100

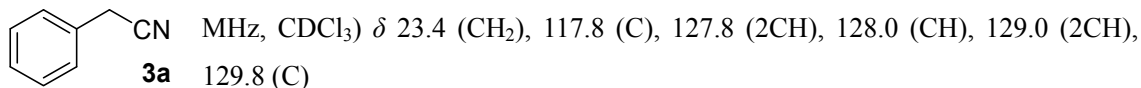

**3b**<sup>1</sup> : colorless liquid; <sup>1</sup>H-NMR (400 MHz, CDCl<sub>3</sub>) δ 2.34 (s, 3H), 3.67 (s, 2H), 7.15 (d, *J* = 8.4 Hz,

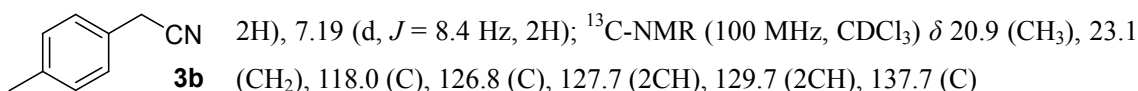

**3c**<sup>1</sup> : colorless liquid; <sup>1</sup>H-NMR (400 MHz, CDCl<sub>3</sub>) δ 3.67 (s, 2H), 3.80 (s, 3H), 6.89 (d, *J* = 8.4 Hz,

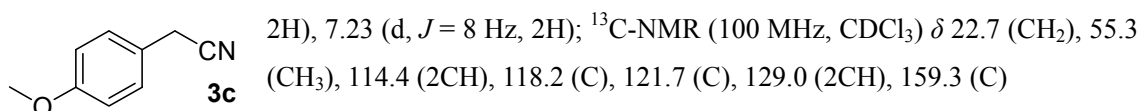

**3d**<sup>1</sup> : colorless liquid; <sup>1</sup>H-NMR (400 MHz, CDCl<sub>3</sub>) δ 3.72 (s, 2H), 7.06 (t, *J* = 8.8 Hz, 2H), 7.29 (dd,

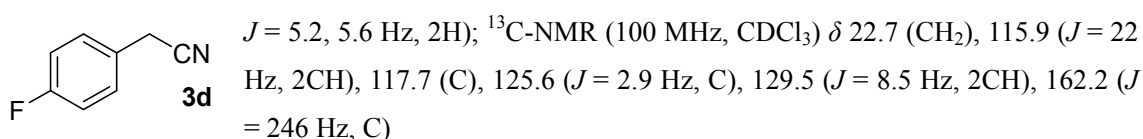

**3e**<sup>2</sup> : white solid; m.p. 60.9-61.2 °C (ref<sup>3</sup>). 61-62 °C), <sup>1</sup>H-NMR (400 MHz, CDCl<sub>3</sub>) δ 3.75 (s, 2H),

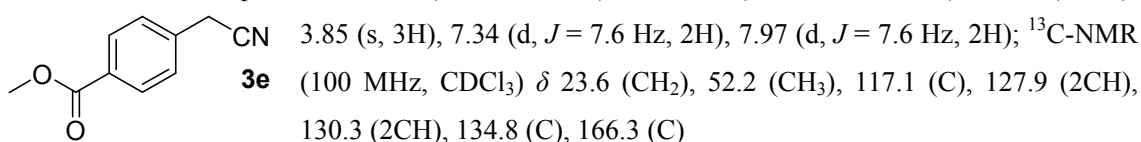

**3f** : colorless liquid; <sup>1</sup>H-NMR (400 MHz, CDCl<sub>3</sub>) δ 3.47 (s, 9H), 3.61(s, 2H), 7.22 (d, *J* = 6.4 Hz,

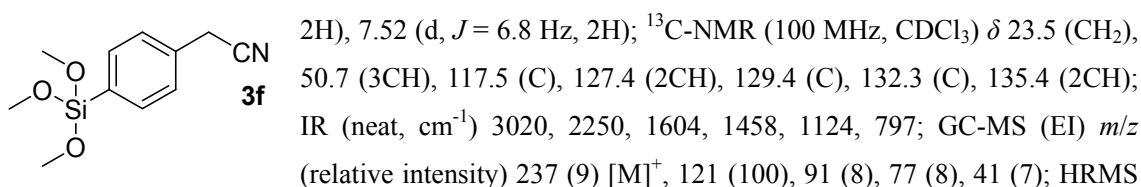

(EI) *m/z* calcd for C<sub>11</sub>H<sub>15</sub>NO<sub>3</sub>Si, [M]<sup>+</sup> 237.0821, found 237.0824

**3g**<sup>1</sup> : colorless liquid; <sup>1</sup>H-NMR (400 MHz, CDCl<sub>3</sub>) δ 2.27 (s, 3H), 3.60 (s, 2H), 7.01-7.24 (m, 4H);

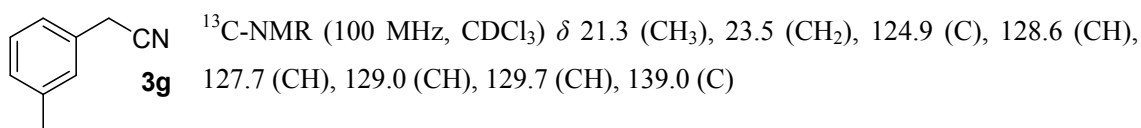

**3h**<sup>1</sup> : colorless liquid; <sup>1</sup>H-NMR (400 MHz, CDCl<sub>3</sub>) δ 2.26 (s, 3H), 3.59 (s, 2H), 7.00-7.23 (m, 4H);

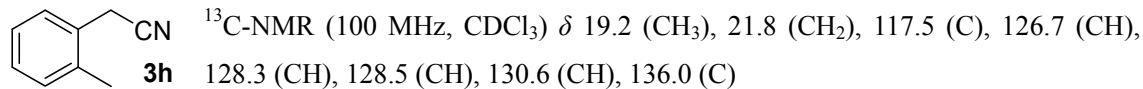

**3i**<sup>3</sup> : colorless liquid; <sup>1</sup>H-NMR (400 MHz, CDCl<sub>3</sub>) δ 2.26 (s, 3H), 2.35 (s, 6H), 3.59 (s, 2H), 6.89 (s, 2H); <sup>13</sup>C-NMR (100 MHz, CDCl<sub>3</sub>) δ 17.3 (CH<sub>3</sub>), 19.9 (2CH<sub>3</sub>), 20.8 (CH<sub>2</sub>), 117.4

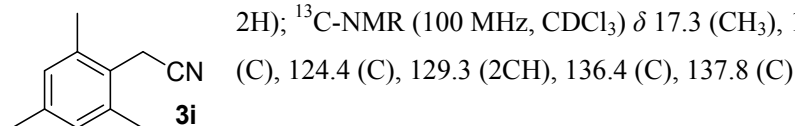

**3j**<sup>4</sup> : beiji solid; m.p. 78-80 °C, <sup>1</sup>H-NMR (400 MHz, CDCl<sub>3</sub>) δ 3.68 (s, 2H), 7.17-7.68 (s, 7H);

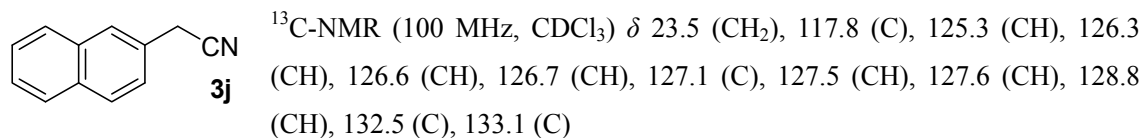

**3k**<sup>1</sup> : colorless liquid; <sup>1</sup>H-NMR (400 MHz, CDCl<sub>3</sub>) δ 1.57 (d, *J* = 7.6 Hz, 3H), 3.83 (q, *J* = 7.2 Hz, 1H), 7.27-7.32 (m, 5H); <sup>13</sup>C-NMR (100 MHz, CDCl<sub>3</sub>) δ 21.4 (CH<sub>3</sub>), 31.2 (CH),

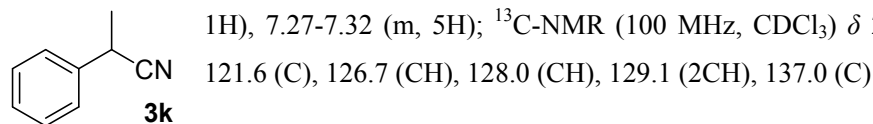

## References

1. Y. Ren, C. Dong, S. Zhao, Y. Sun, J. Wang, J. Ma and C. Hou, *Tetrahedron Lett.*, 2012, **53**, 2825.
2. E.G. Sakellriou, *Tetrahedron*, 2013, **59**, 9083.
3. Z. Pechlivanidis, H. Hopf and L. Ernst, *Eur. J. Org. Chem.*, 2009, 223.
4. J. Velicky, A. Soicke, R. Steiner and H.-G. Schmalz, *J. Am. Chem. Soc.*, 2011, **133**, 6948.

$^1\text{H}$  NMR

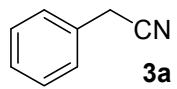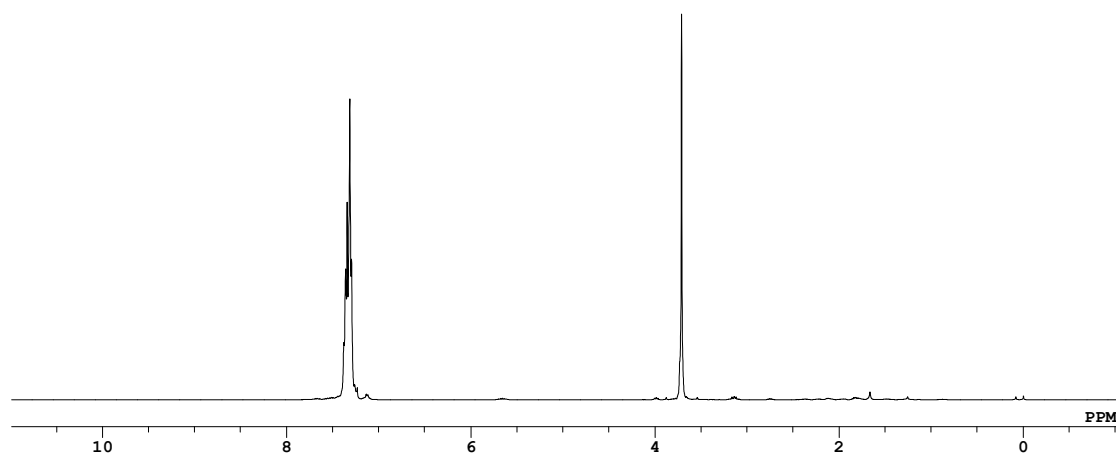

$^{13}\text{C}$  NMR

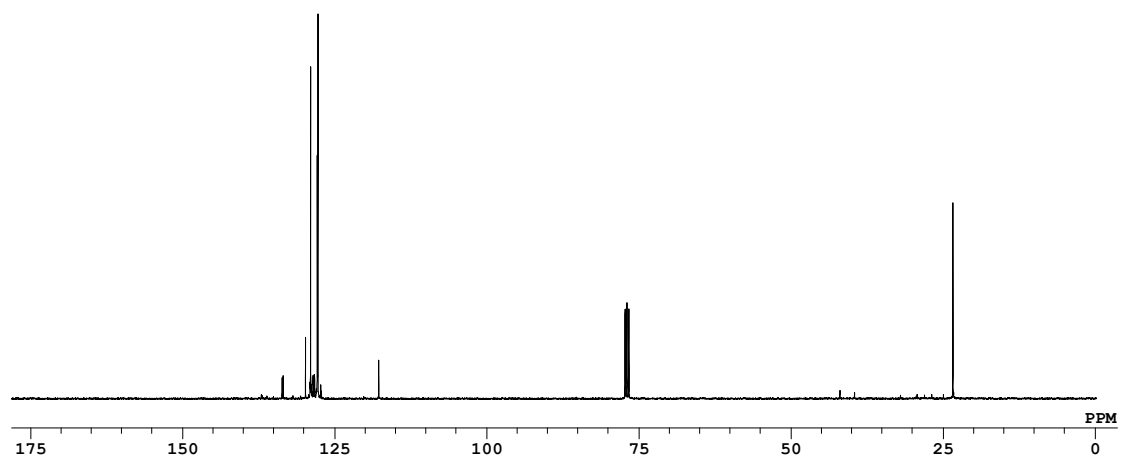

$^1\text{H}$  NMR

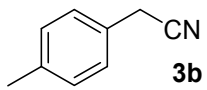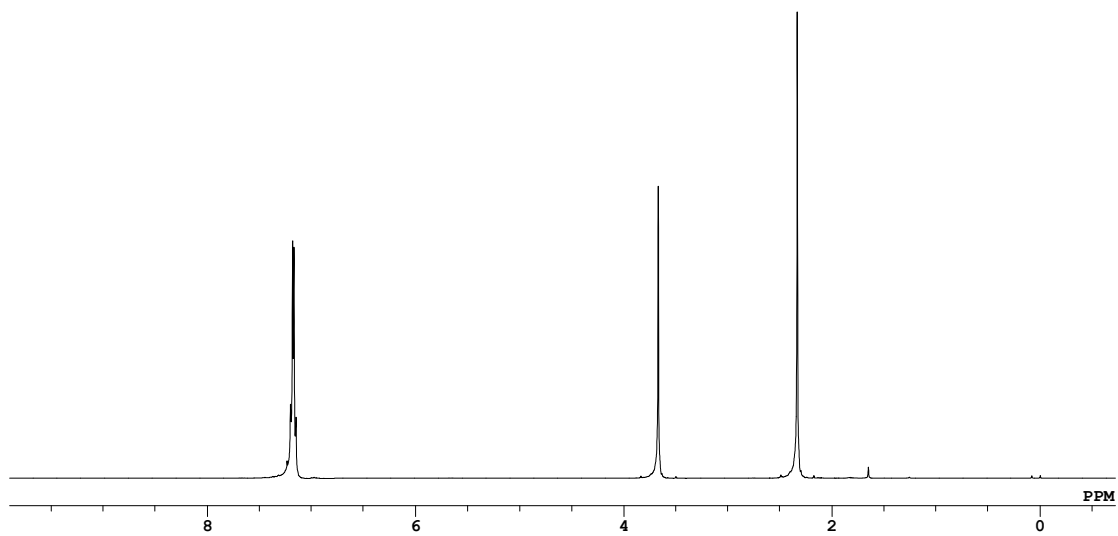

$^{13}\text{C}$  NMR

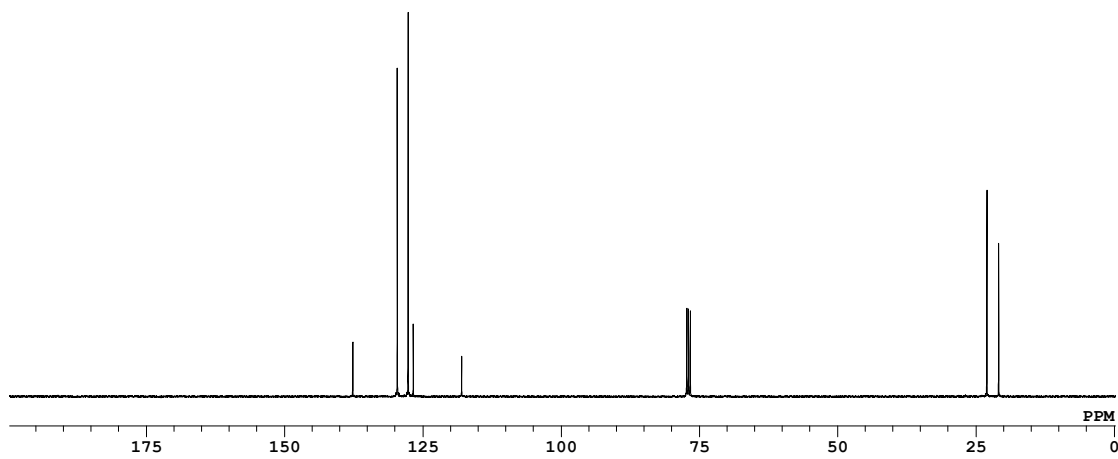

$^1\text{H}$  NMR

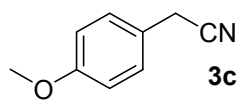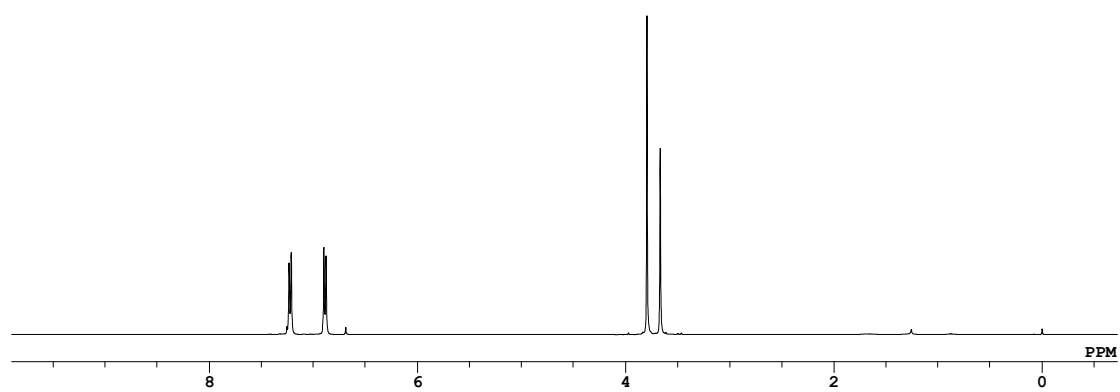

$^{13}\text{C}$  NMR

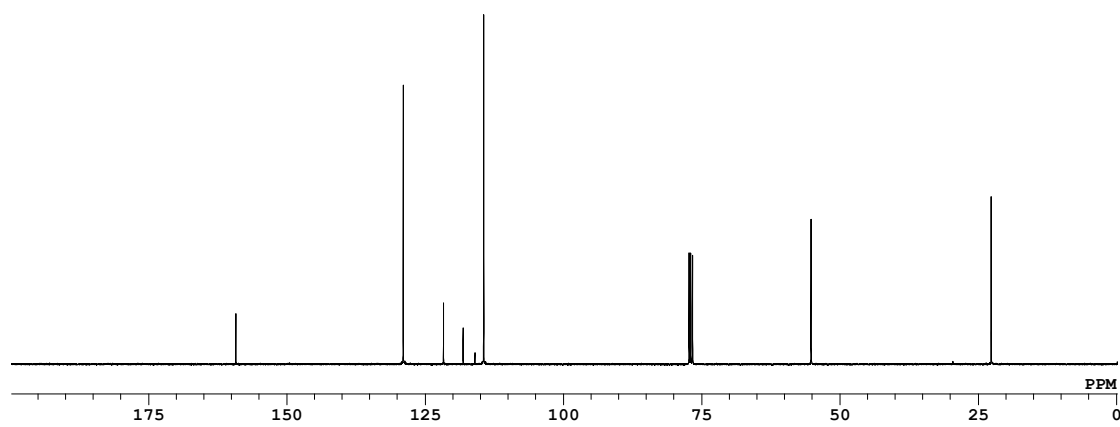

$^1\text{H}$  NMR

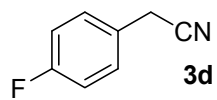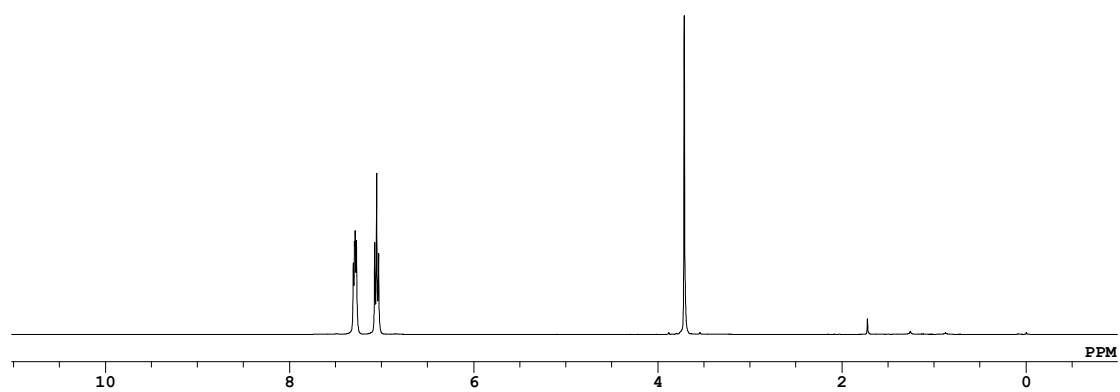

$^{13}\text{C}$  NMR

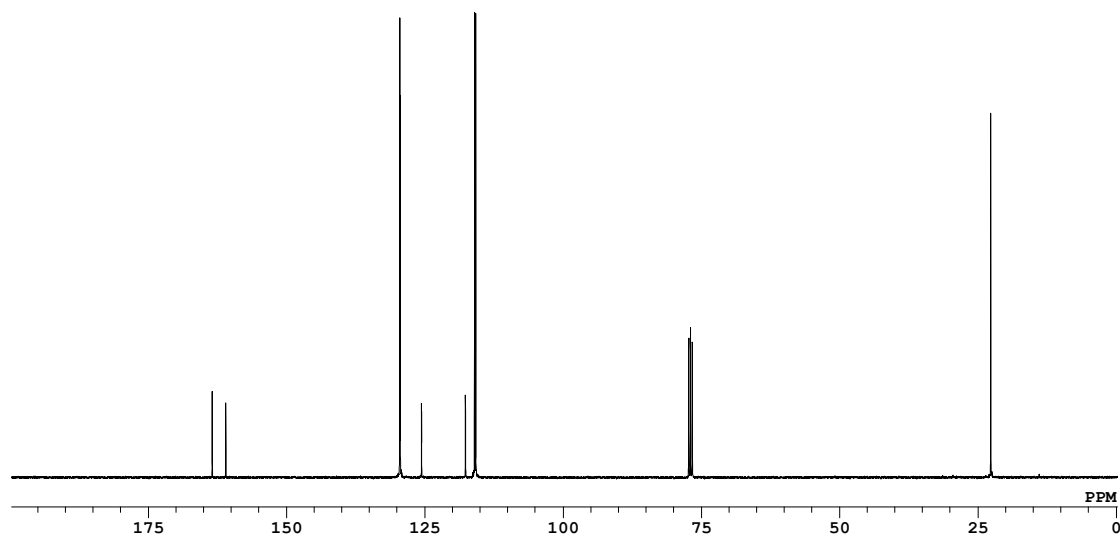



$^1\text{H}$  NMR

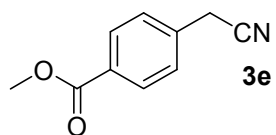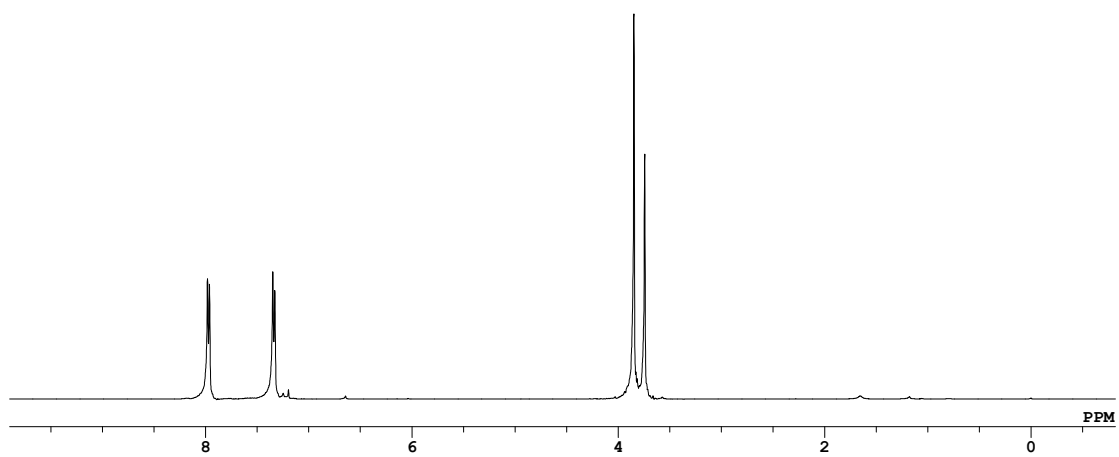

$^{13}\text{C}$  NMR

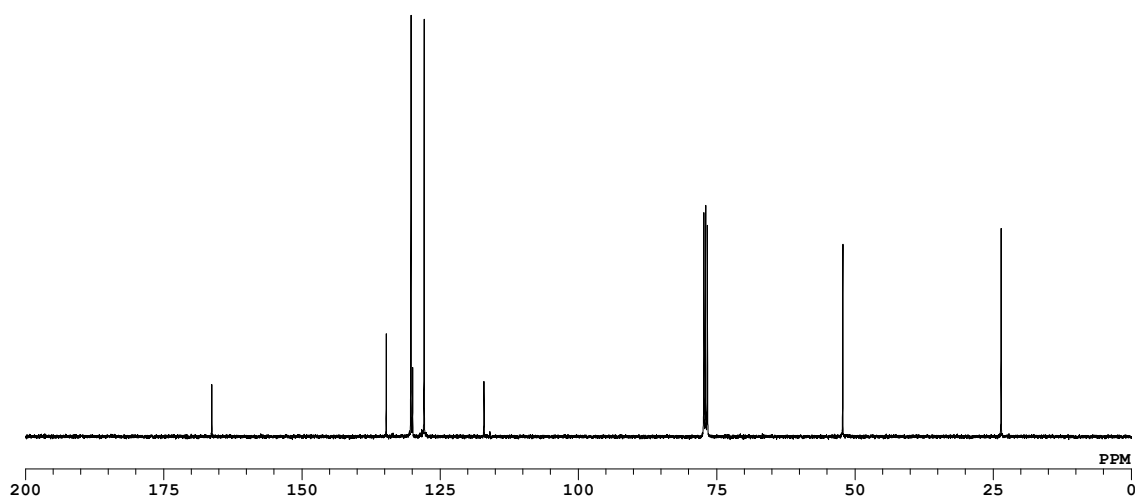

$^1\text{H}$  NMR

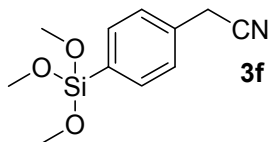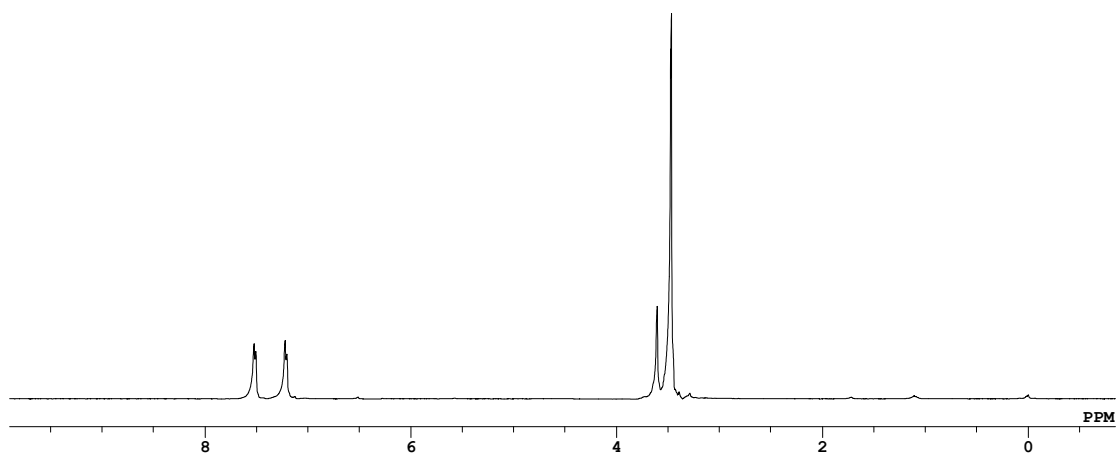

$^{13}\text{C}$  NMR

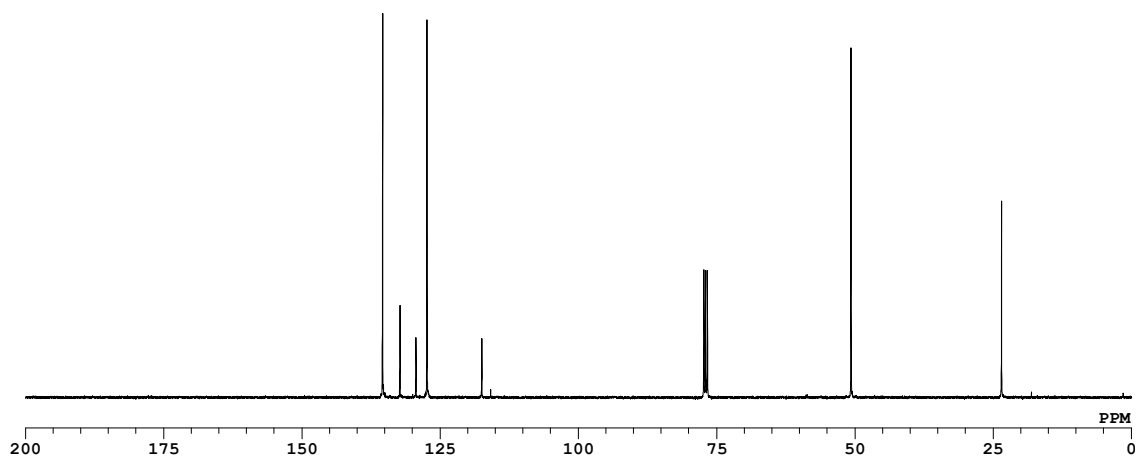

$^1\text{H}$  NMR

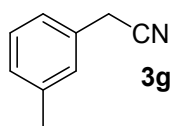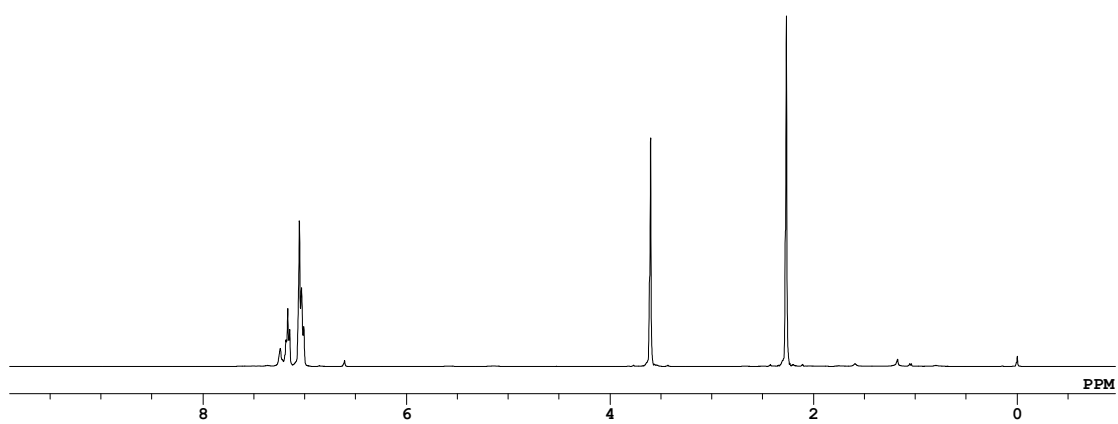

$^{13}\text{C}$  NMR

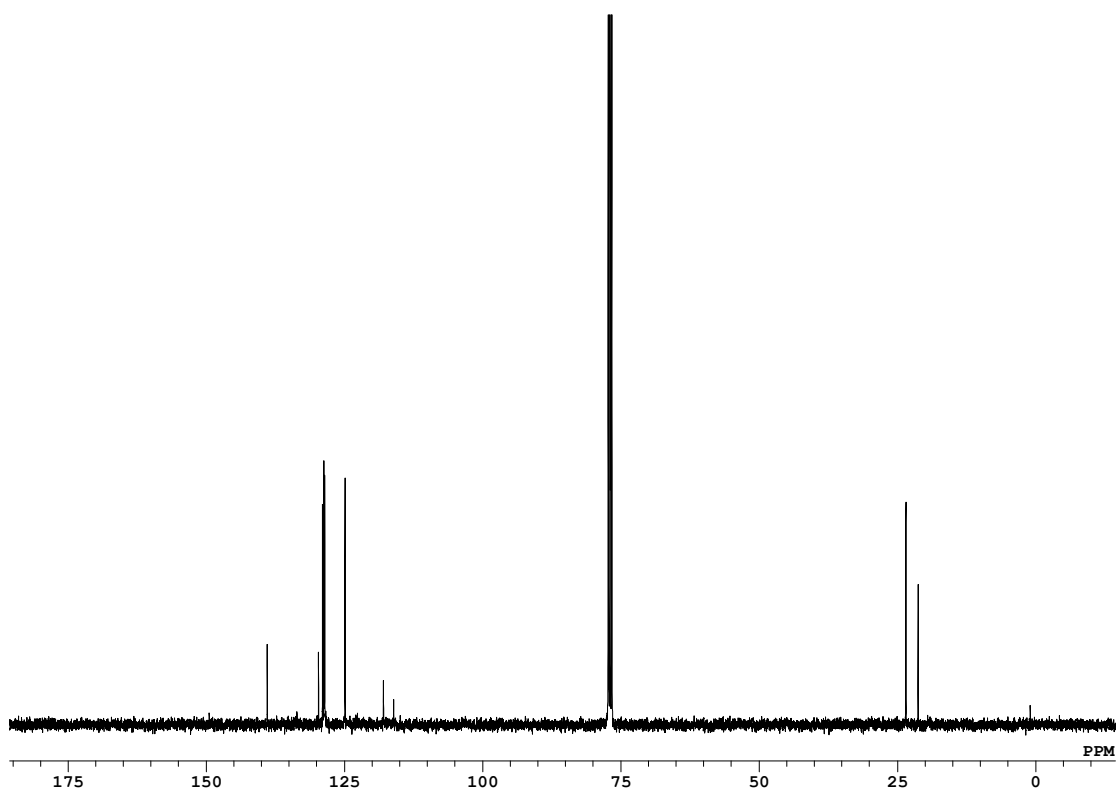

$^1\text{H}$  NMR

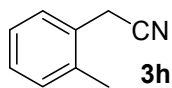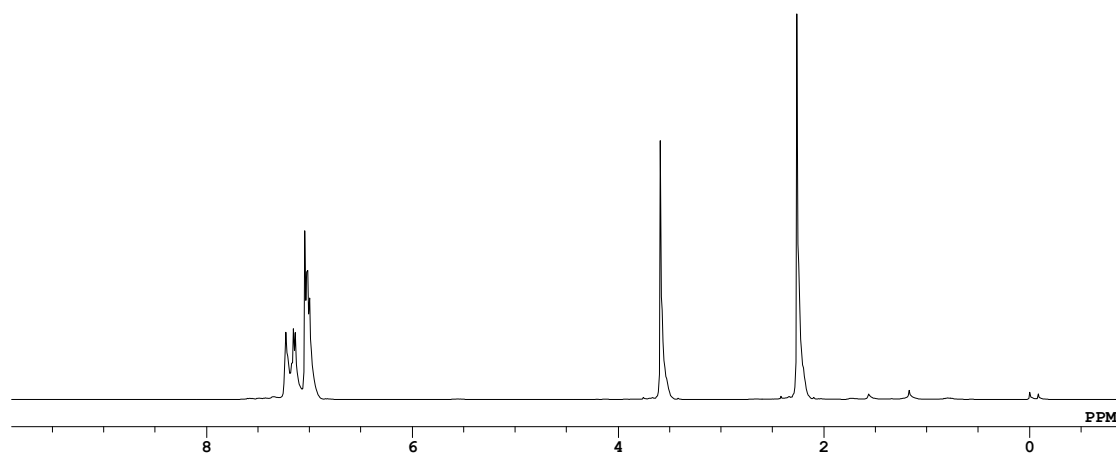

$^{13}\text{C}$  NMR

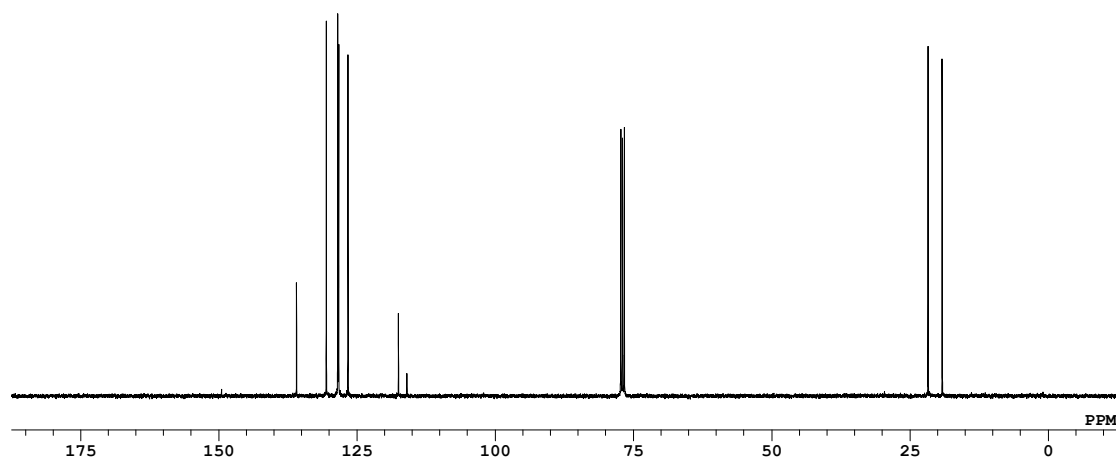

$^1\text{H}$  NMR

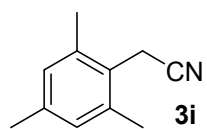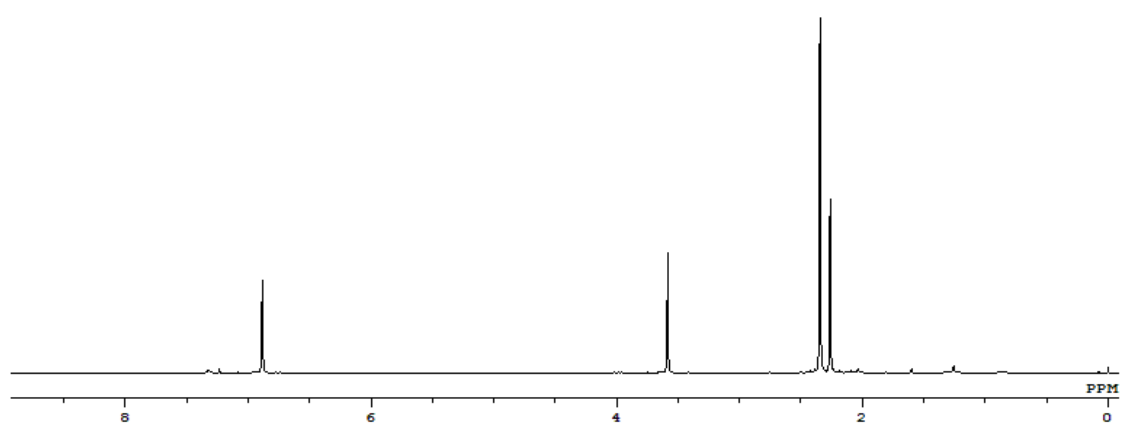

$^{13}\text{C}$  NMR

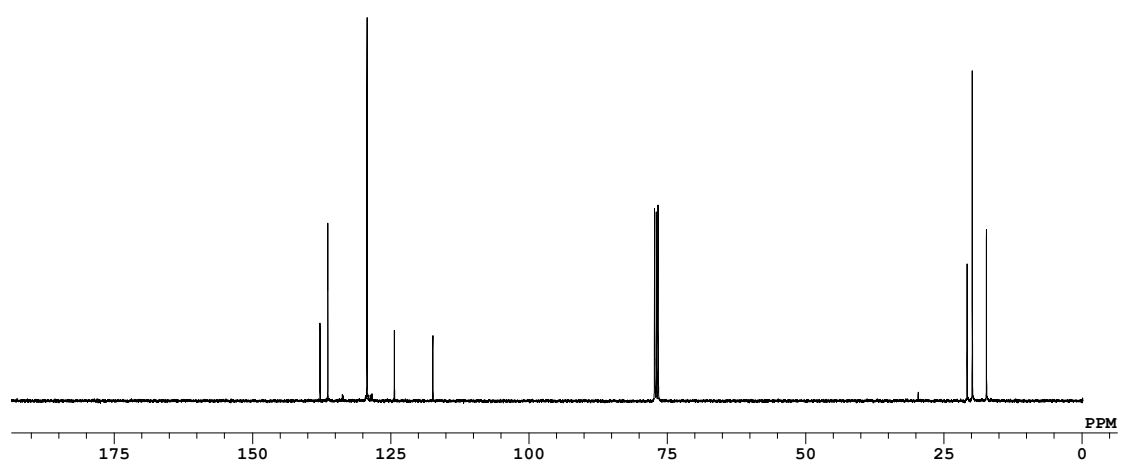

$^1\text{H}$  NMR

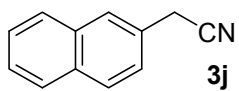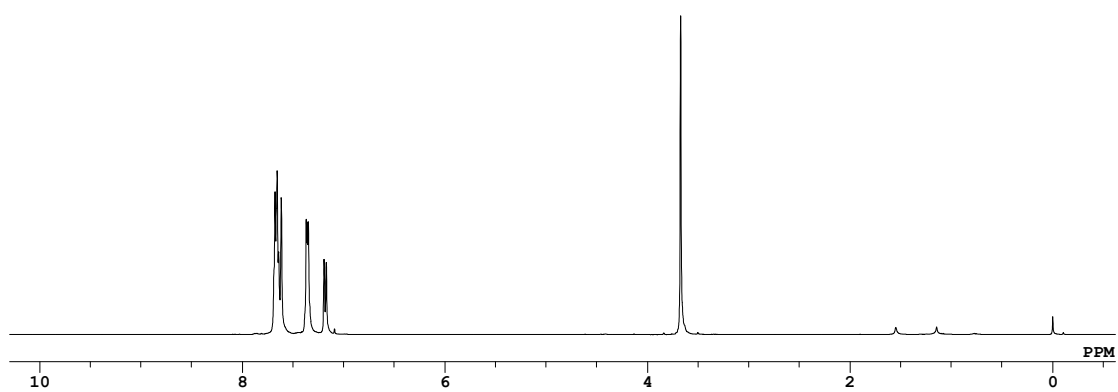

$^{13}\text{C}$  NMR

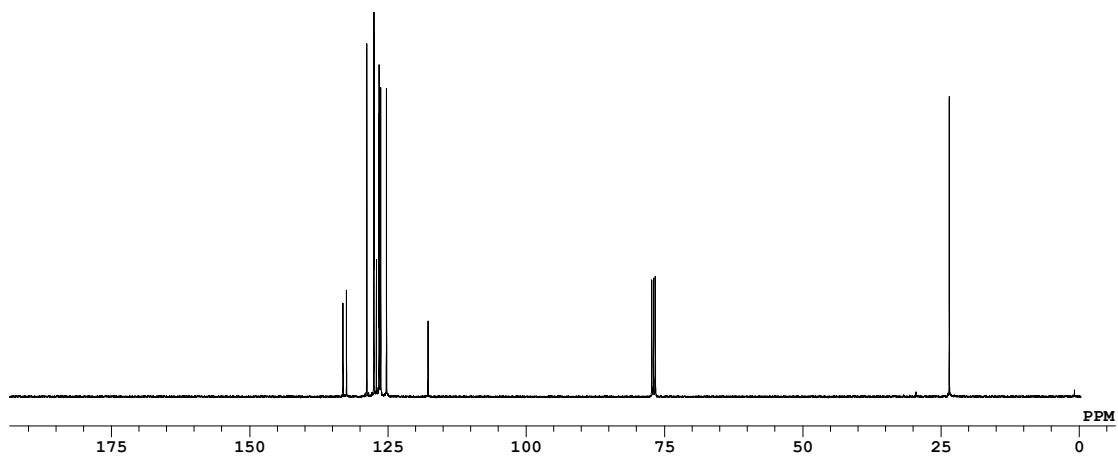

$^1\text{H}$  NMR

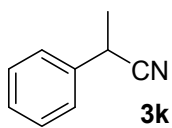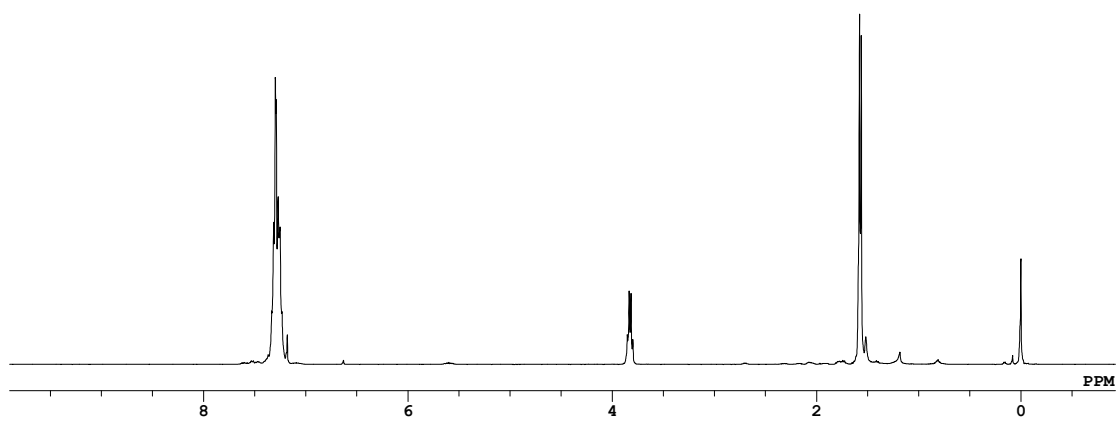

$^{13}\text{C}$  NMR

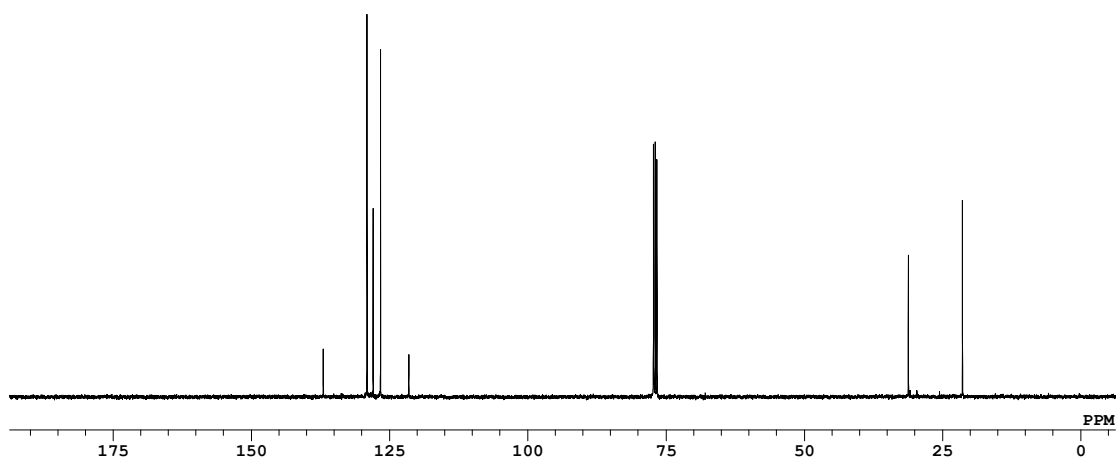

Supplement: c4ra01153h1.pdf [file c4ra01153h1.pdf]
